# Supplementary material
Source: publisher site journal article supplement (https://www.dovepress.com/article/384481)
Supplement: Supplementary file 1 [file get_supplementary_file.php]

Supporting Information

# A biomimetic smart nanoplatform as “inflammation scavenger” for regenerative therapy of periodontal tissue

Poyu Chen1, 2, 3*, Chuangwei Zhang1, 2, 3*, Ping He4, Shengyuan Pan1, 2, 3, Wenjie Zhong1, 2, 3, Yue Wang1, 2, 3, Qingyue Xiao1, 2, 3, Xinyan Wang1, 2, 3, Wenliang Yu1, 2, 3, Zhangmin He1, 2, 3, Xiang Gao1, 2, 3#, Jinlin Song1, 2, 3#

1College of Stomatology, Chongqing Medical University, Chongqing 401147, People’s Republic of China;

2Chongqing Key Laboratory of Oral Diseases and Biomedical Sciences, Chongqing 401147, People’s Republic of China;

3Chongqing Municipal Key Laboratory of Oral Biomedical Engineering of Higher Education, Chongqing 401147, People’s Republic of China;

4Department of Stomatology, Dazhou Central Hospital, Dazhou, SiChuan 635000, People’s Republic of China.

*These authors contributed equally to this work

Correspondence:

#Prof. Xiang Gao, Chongqing Key Laboratory for Oral Diseases and Biomedical Sciences, Chongqing 401147, People’s Republic of China

Tel & Fax: +86 23 88860105.

E-mail: xiangg@hospital.cqmu.edu.cn

#Prof. Jinlin Song, Chongqing Key Laboratory for Oral Diseases and Biomedical Sciences, Chongqing 401147, People’s Republic of China

Tel & Fax: +86 23 88860026.

E-mail: songjinlin@hospital.cqmu.edu.cn

| **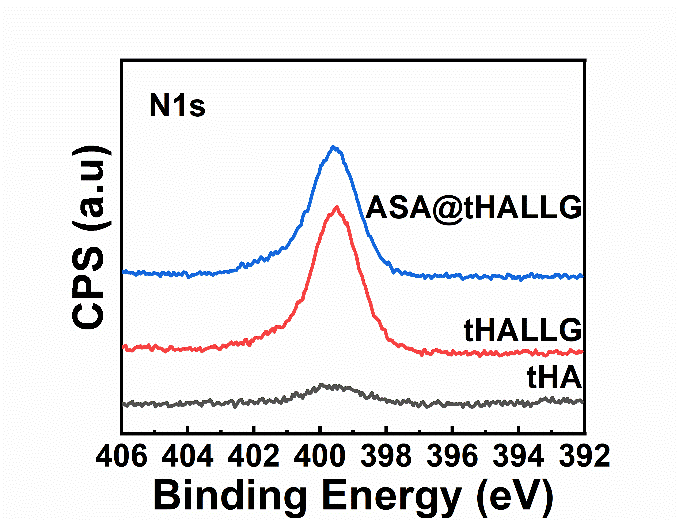** |
| --- |
| **Figure S1.** High-resolution nitrogen spectra of tHA, tHALLG and ASA@tHALLG nanocomposites. |

| 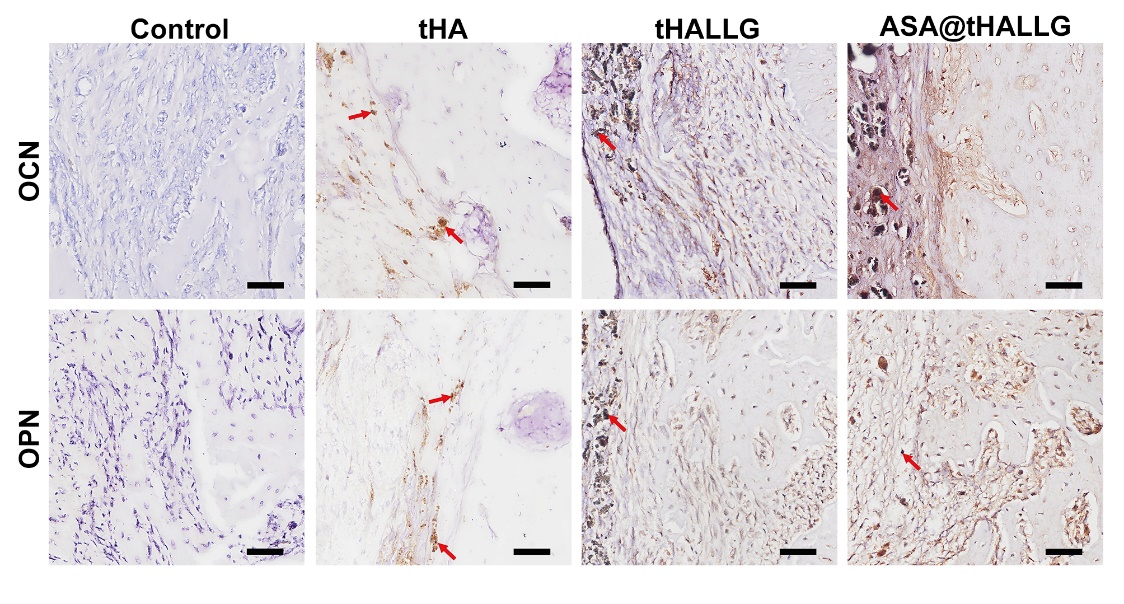 |
| --- |
| **Figure S2.** IHC staining of OCN and OPN in defects treated by tHA, tHALLG and ASA@tHALLG nanocomposites. Red arrows indicate the implanted materials. |

| 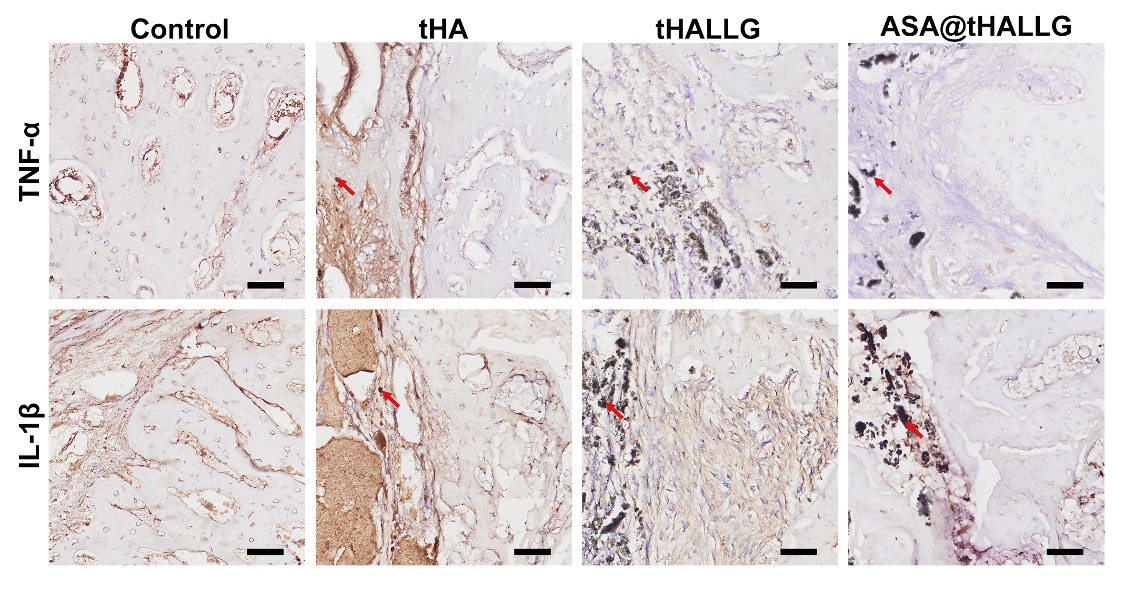 |
| --- |
| **Figure S3.** IHC staining of TNF-α and IL-1β in defects treated by tHA, tHALLG and ASA@tHALLG nanocomposites. Red arrows indicate the implanted materials. |

**Table S1.** The primers used in this study

| **Gene** | **Primer sequence (5'→3')** |
| --- | --- |
| GAPDH | (F) CGACAGTCAGCCGCATCTT  (R) CCAATACGACCAAATCCGTTG |
| Runx2 | (F) AGGAATGCGCCCTAAATCACT  (R)ACCCAGAAGGCACAGACAGAAG |
| COL1A1 | (F) AGACACTGGTGCTAAGGGAGAG  (R) GACCAGCAACACCATCTGCG |
| ALP | (F) GAACGTGGTCACCTCCATCCT  (R) TCTCGTGGTCACAATGC |
| TNF-α | (F) TCTTCTCCTTCCTGATCGTGG  (R) AGGGCTGATTAGAGAGAGGTCC |
| IL-1β | (F) GAAATGATGGCTTATTACAGTGGC  (R) TTGCTGTAGTGGTGGTCGGAG |
| IL-6 | (F) GAGTAGTGAGGAACAAGCCAGAG  (R) GGTCAGGGGTGGTTATTGC |
